# Supplementary material for: Investigation of HO 2 uptake onto Cu( ii )- and Fe( ii )-doped aqueous inorganic aerosols and seawater aerosols using laser spectroscopic techniques
Source: Royal Society of Chemistry journal article supplement (doi:10.1039/d3ea00093a), 2023-01-01
Supplement: d3ea00093a1.pdf [file d3ea00093a1.pdf]

## Appendix

# Investigation of HO<sub>2</sub> uptake onto Cu(II)- and Fe(II)-doped aqueous inorganic aerosols and seawater aerosols using laser spectroscopic techniques

Jiaru Li<sup>1,2</sup>, Yosuke Sakamoto<sup>1,2,3</sup>, Kei Sato<sup>2</sup>, Yu Morino<sup>2</sup>, Yoshizumi Kajii<sup>1,2,3,4</sup>

<sup>1</sup>Graduate School of Global Environmental Studies, Kyoto University, Kyoto, 606-8501, Japan

<sup>2</sup>National Institute for Environmental Studies, Tsukuba, 305-8506, Japan

<sup>3</sup>Graduate School of Human and Environmental Studies, Kyoto University, Kyoto, 606-8316, Japan

<sup>4</sup>School of Environmental Science and Engineering, Qingdao University, Qingdao, 266071, P.R. China

*Correspondence to:* Yosuke Sakamoto ([sakamoto.yosuke.7a@kyoto-u.ac.jp](mailto:sakamoto.yosuke.7a@kyoto-u.ac.jp)); Yoshizumi Kajii ([kajii.yoshizumi.7e@kyoto-u.ac.jp](mailto:kajii.yoshizumi.7e@kyoto-u.ac.jp))

Table A1. Chemical components of the detected seawater from Hachijojima.

| Composition                   | Seawater (Hachijojima) w/v |
|-------------------------------|----------------------------|
| NaCl                          | 3.5%                       |
| NO <sub>3</sub> <sup>-</sup>  | 0.17%                      |
| PO <sub>4</sub> <sup>3-</sup> | 0.013%                     |
| SiO <sub>2</sub>              | 0.40%                      |

Table A2. Input and output variables for E-AIM and ISORROPIA.

|        | E-AIM                                                                                                                                                        | ISORROPIA                                                                                                                                 |
|--------|--------------------------------------------------------------------------------------------------------------------------------------------------------------|-------------------------------------------------------------------------------------------------------------------------------------------|
| Input  | Temperature, Relative humidity, [H <sup>+</sup> ], [NH <sub>4</sub> <sup>+</sup> ], [Na <sup>+</sup> ], [SO <sub>4</sub> <sup>2-</sup> ], [Cl <sup>-</sup> ] | Temperature, Relative humidity, [Na <sup>+</sup> ], [SO <sub>4</sub> <sup>2-</sup> ], [NH <sub>4</sub> <sup>+</sup> ], [Cl <sup>-</sup> ] |
| Output | moles of species in the aqueous phase, moles of gases, and aerosol water content                                                                             | Equilibrium concentrations and aerosol water content                                                                                      |

Table A3. Concentration of additions in the aerosol phase estimated from E-AIM and ISORROPIA models at room temperature.

| solutions                                               | [TMI]s (M) |           |
|---------------------------------------------------------|------------|-----------|
|                                                         | E-AIM      | ISORROPIA |
| NaCl+Cu(II)                                             | 0.10       | 0.10      |
| NaCl+Fe(II)                                             | 0.06       | 0.06      |
| NaCl+L-ascorbate                                        | 0.07       | 0.07      |
| (NH <sub>4</sub> ) <sub>2</sub> SO <sub>4</sub> +Cu(II) | 0.11       | 0.10      |
| (NH <sub>4</sub> ) <sub>2</sub> SO <sub>4</sub> +Fe(II) | 0.11       | 0.11      |
| Na <sub>2</sub> SO <sub>4</sub> +Cu(II)                 | 0.12       | 0.12      |
| Na <sub>2</sub> SO <sub>4</sub> +Fe(II)                 | 0.10       | 0.11      |

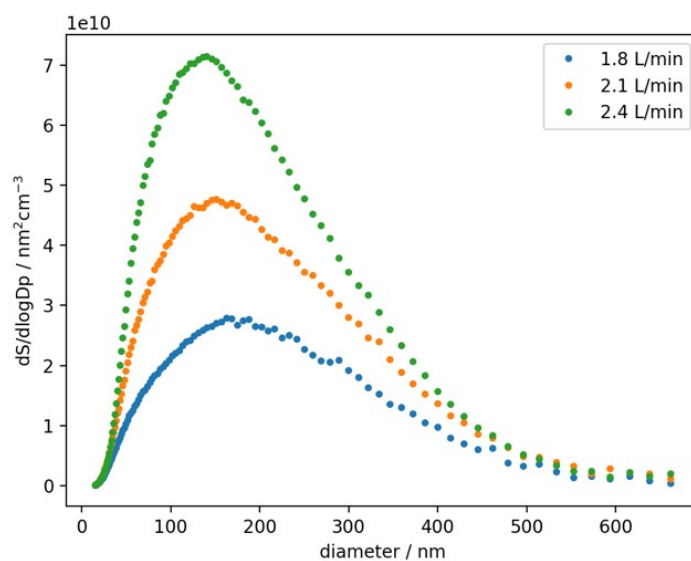

Figure A1. Examples of the surface distribution of deliquesced NaCl particles with different dilution zero-gas flow rates.

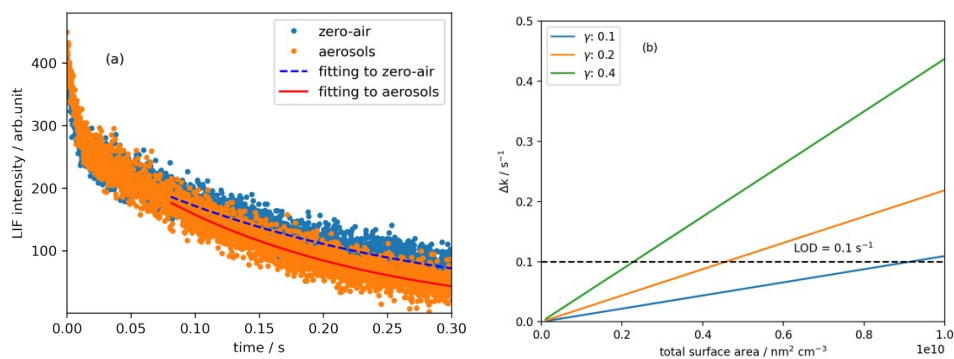

Figure A2. (a): Examples of the decay profile of  $\text{HO}_2$  loss rate with zero-air and with aerosols. Solid and dashed lines are the single exponential fitting lines to extrapolate the decay rate with time range from 0.08 to 0.5 s; (b): Theoretic loss rate of  $\text{HO}_2$  with respect to aerosol total surface area estimated from the gamma equals 0.1, 0.2, and 0.4. The dashed line refers to the limit of detection of LP-LIF.

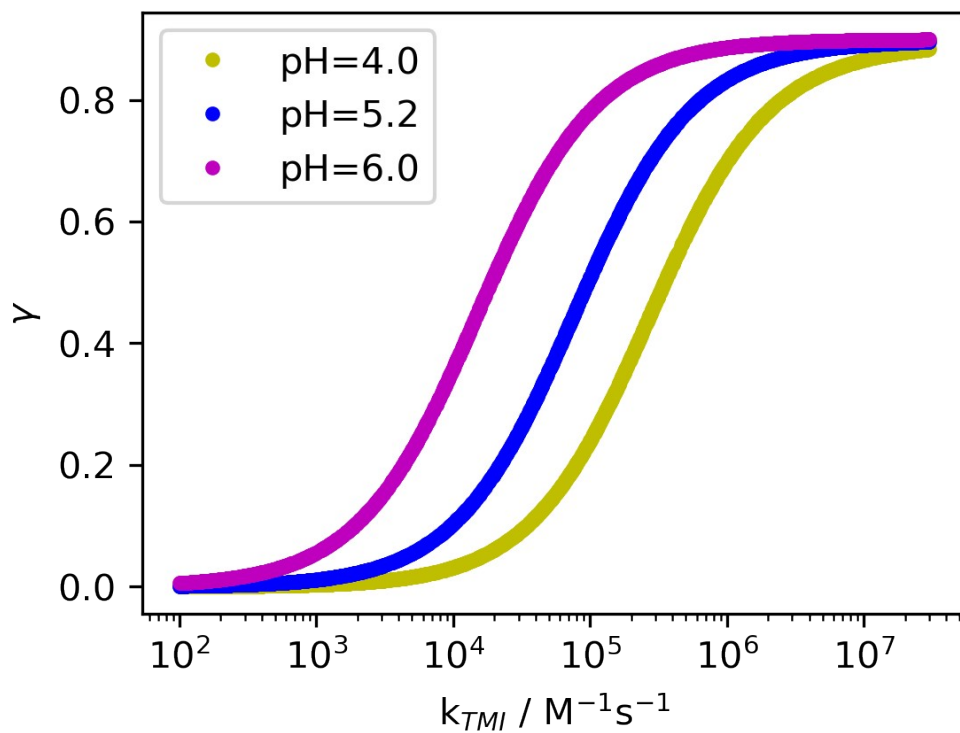

Figure A3. Example of the estimation of the rate constant of  $\text{HO}_2$  with the presence of TMIs in the aerosol-phase versus uptake coefficient under different pH conditions.
